# Supplementary material
Source: publisher figshare collection journal article supplement (https://acs.figshare.com/ndownloader/files/6927692)
Supplement: Supplementary file 1 [file 6927692]

**Rational Integration of Inbuilt Aperture with Mesoporous  
Framework in Unusual Asymmetrical Yolk-Shell Structures for  
Energy Storage and Conversion**

Ting Zhu,<sup>†</sup> Liangliang Zhu,<sup>†</sup> Jing Wang,<sup>†</sup> and Ghim Wei Ho<sup>†‡§\*</sup>

<sup>†</sup>Department of Electrical and Computer Engineering, National University of Singapore,  
4 Engineering Drive 3, Singapore 117583

<sup>‡</sup>Engineering Science Programme, National University of Singapore, 9 Engineering Drive 1,  
Singapore 117575

<sup>§</sup>Institute of Materials Research and Engineering, A\*STAR (Agency for Science, Technology  
and Research), 3 Research Link, Singapore 117602

**Corresponding Author**

\*Email: [elehgw@nus.edu.sg](mailto:elehgw@nus.edu.sg)

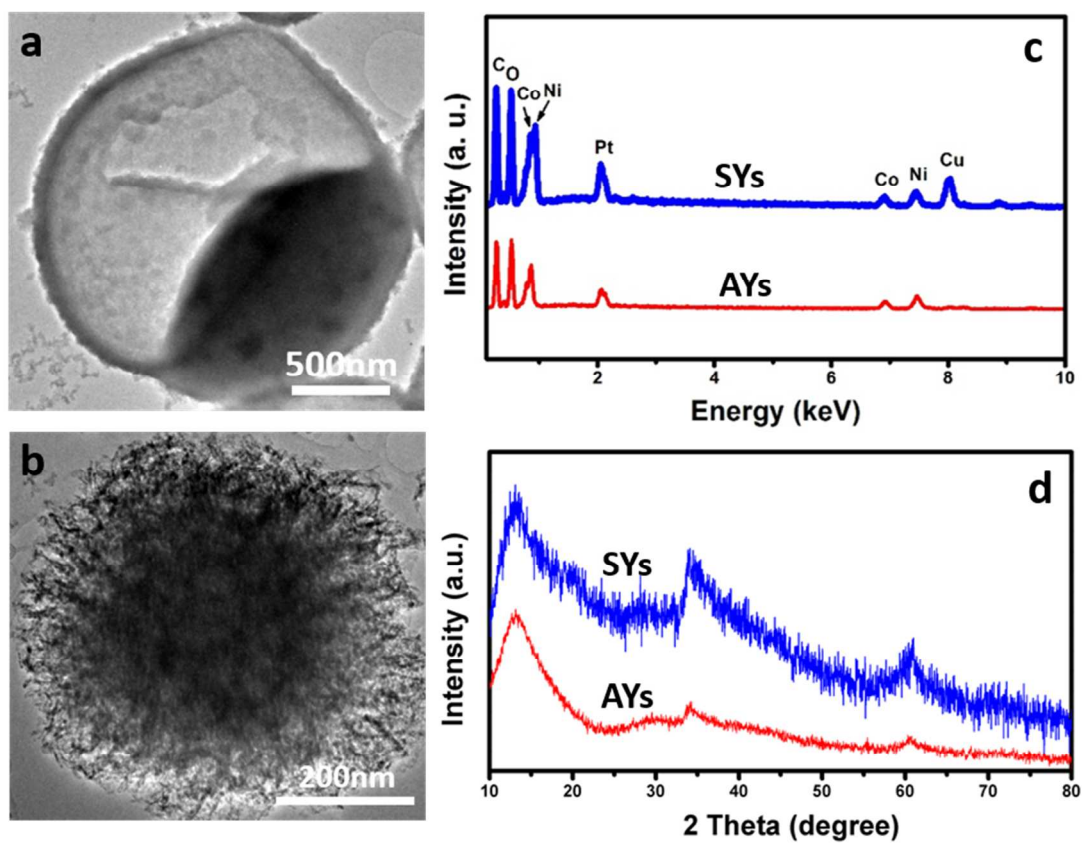

**Figure S1.** TEM images (a and b) of the SYs (a) and AYs (b), EDX (c) and XRD (d) results of the Ni-Co precursors.

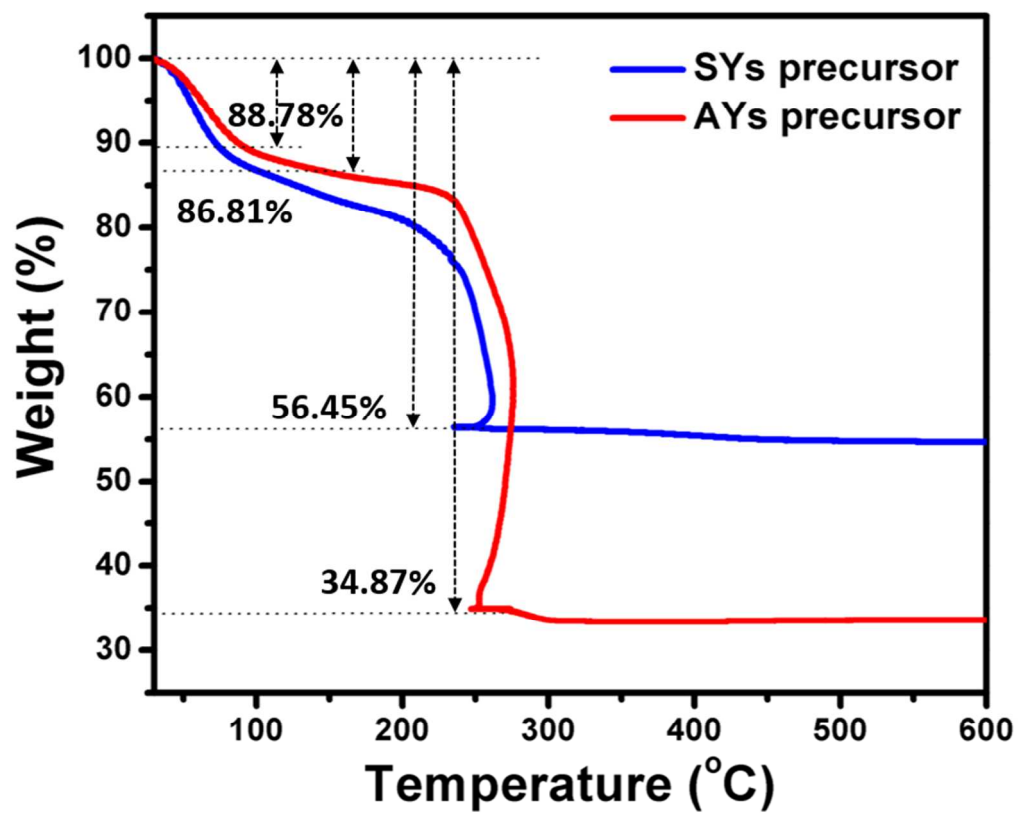

**Figure S2.** TGA curves of the SYs and AYs Ni-Co precursors.

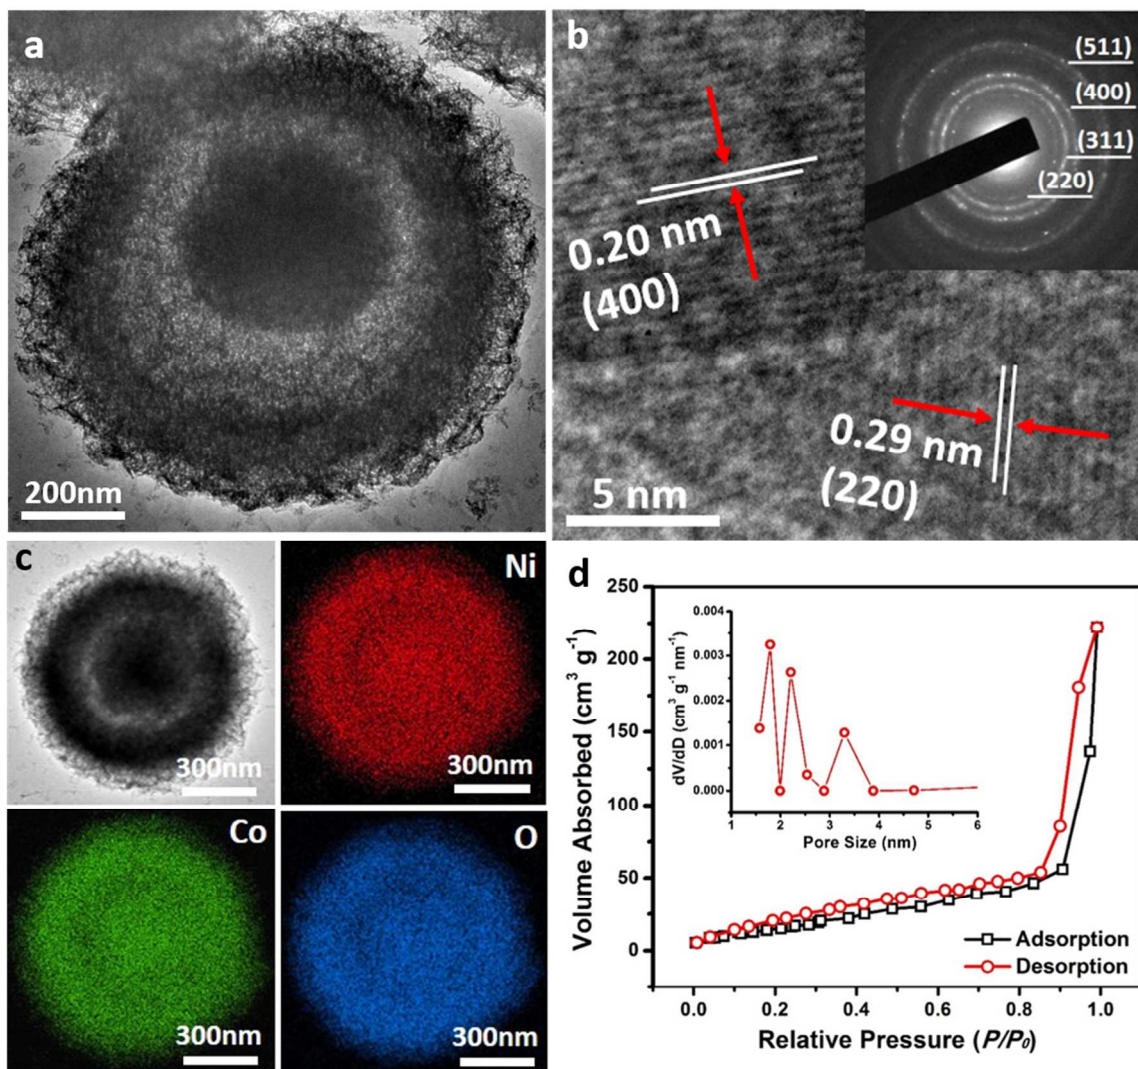

**Figure S3.** TEM (a), HRTEM (b) with SAED diffraction pattern (inset), TEM elemental mapping (c) and BET isotherm (d) with pore size distribution (inset) of the  $\text{NiCo}_2\text{O}_4$  SYs structure.

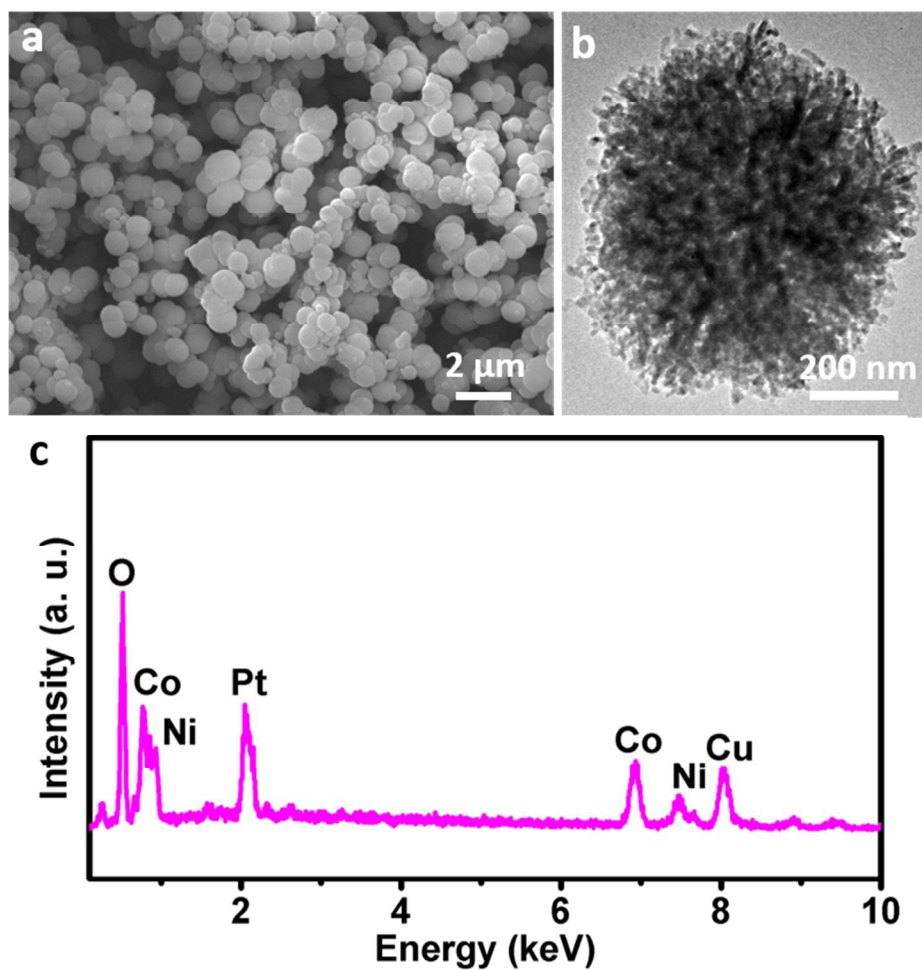

**Figure S4.** SEM (a), TEM (b) and EDX (c) of  $\text{NiCo}_2\text{O}_4$  nanoparticles (control sample).

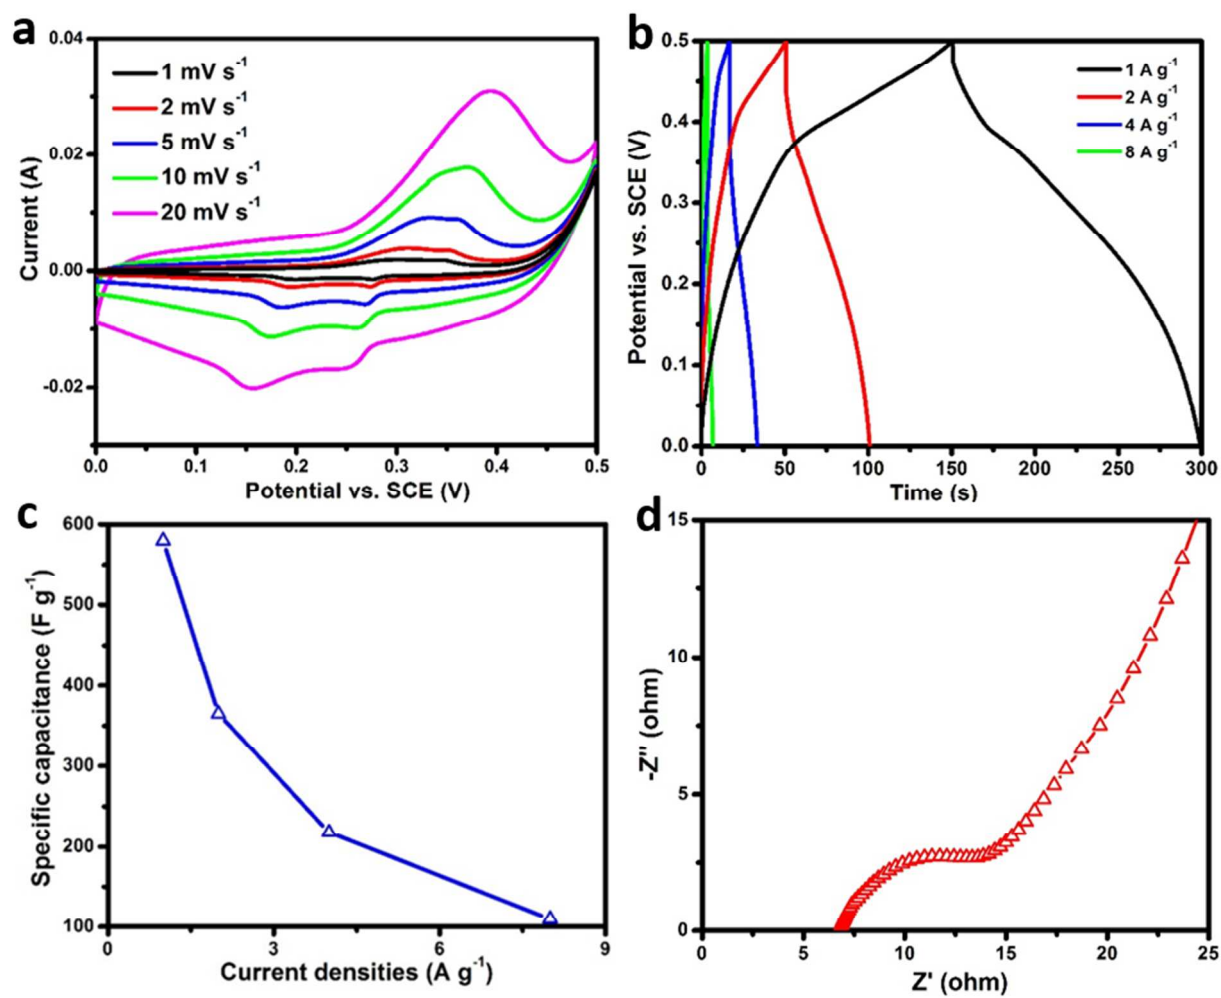

**Figure S5.** CV (a), GCCD (b), capacitances calculated from CV and EIS (d) curves of NiCo<sub>2</sub>O<sub>4</sub> nanoparticles (control sample).

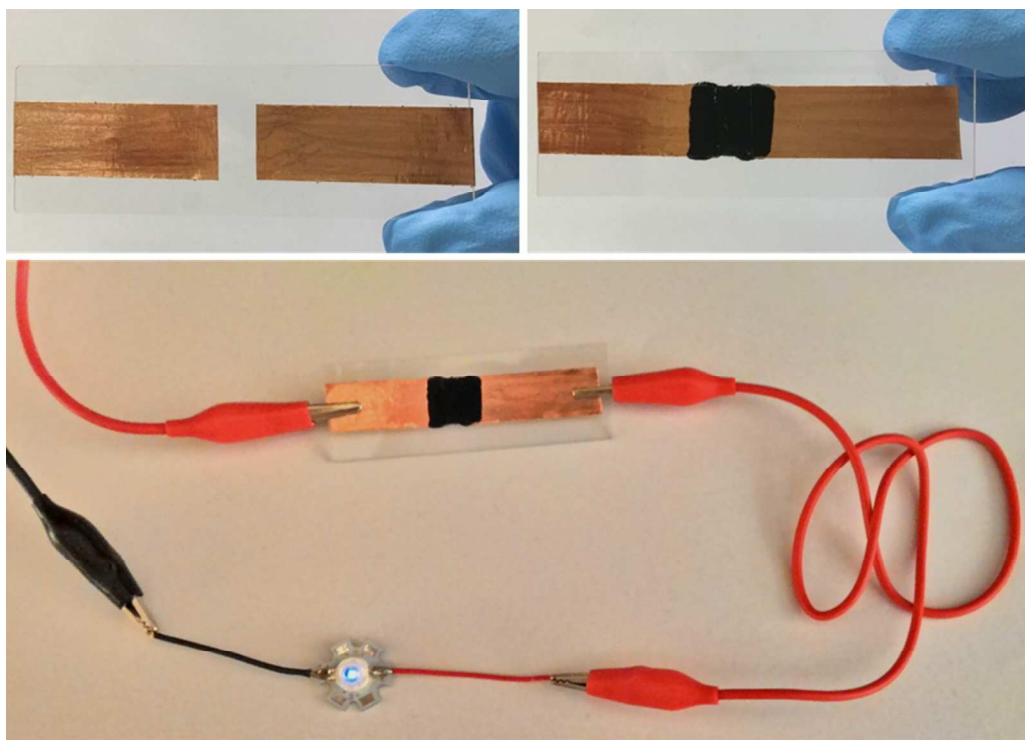

**Figure S6.** Electrical conductivity demonstration of  $\text{NiCo}_2\text{O}_4$  nanoparticles (control sample).



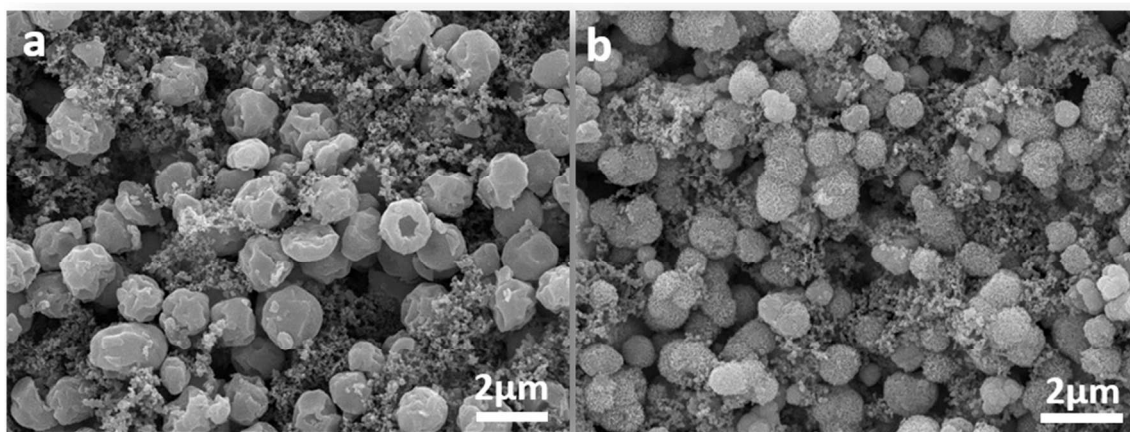

**Figure S7.** SEM images of the AYs (a) and SYs (b) structures after 5000 cycles as supercapacitor electrodes.



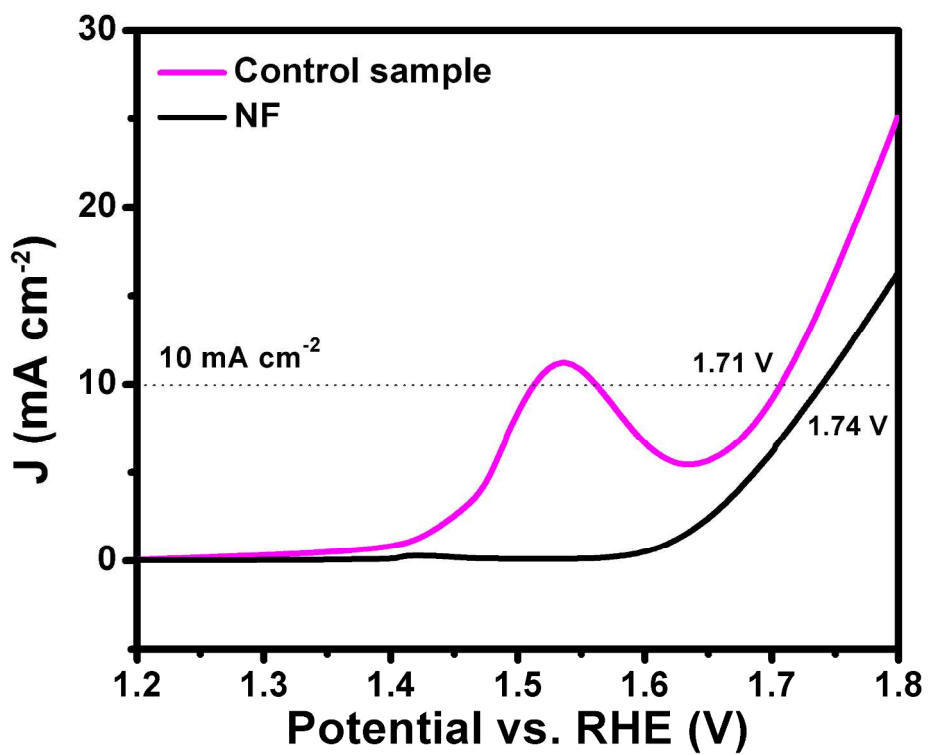

**Figure S8.** Polarization curves of NiCo<sub>2</sub>O<sub>4</sub> nanoparticles (control sample) and NF.

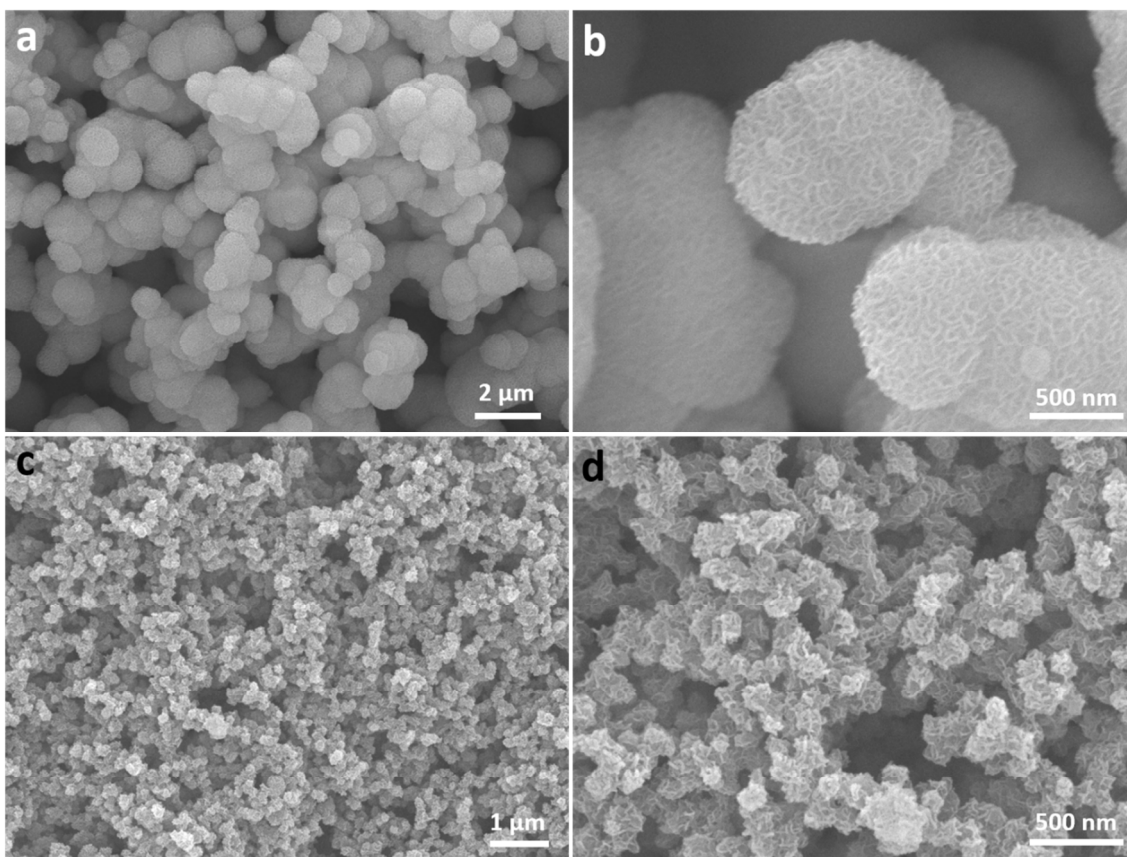

**Figure S9.** SEM images of the samples prepared by the recipes of SYs (a and b) and AYs (c and d) but using ethanol as solvents instead of IPA.

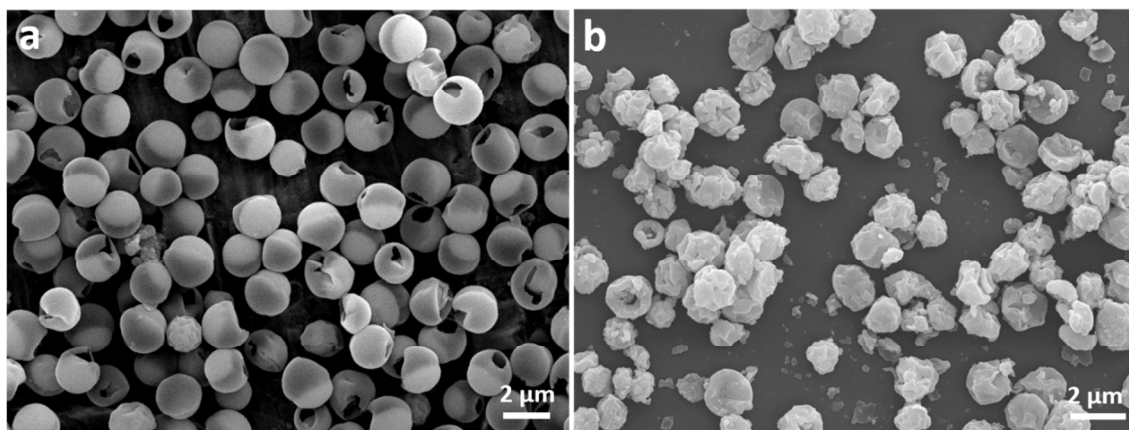

**Figure S10.** SEM images of the AYs sample annealed at 300 °C (a) and 500 °C (b), respectively.

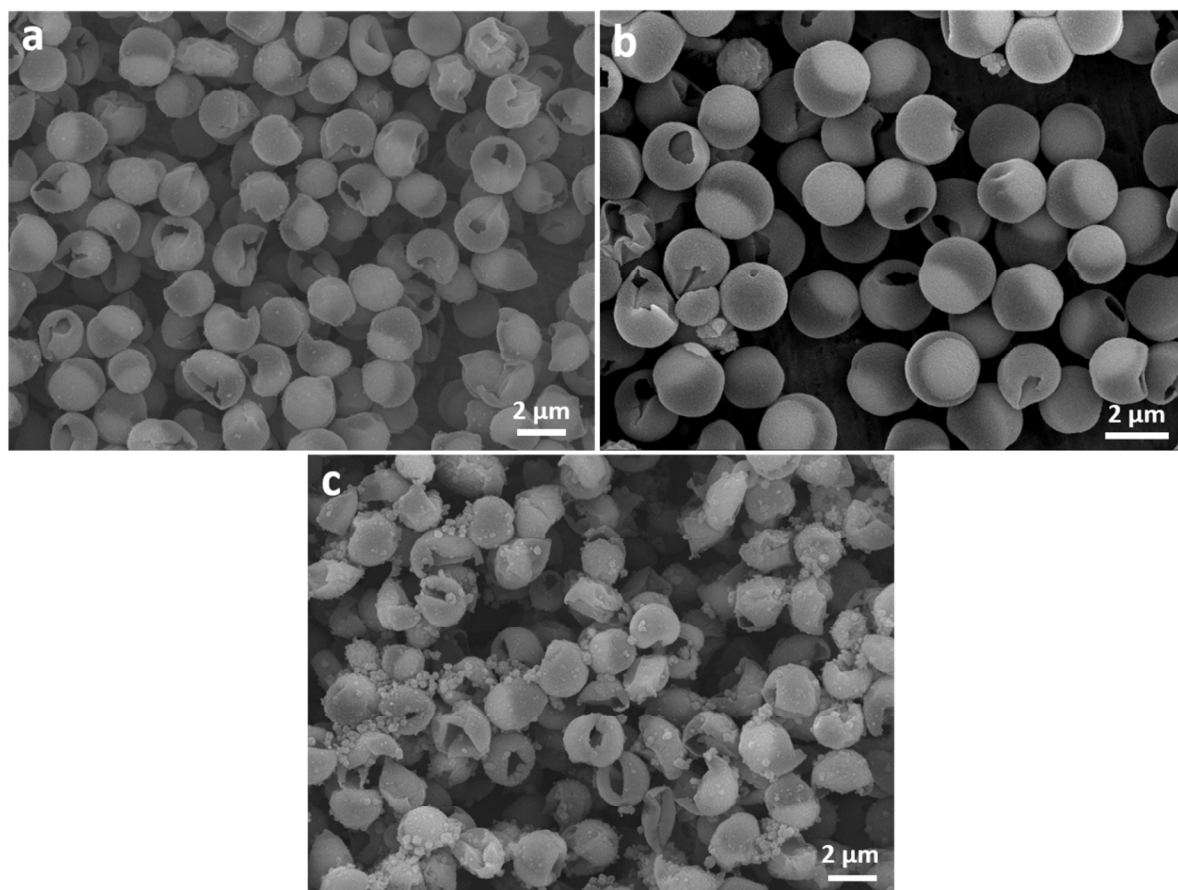

**Figure S11.** SEM images of the AYs sample precursor collected at 2 h (a), 4 h (b), and 8 h (c), respectively.

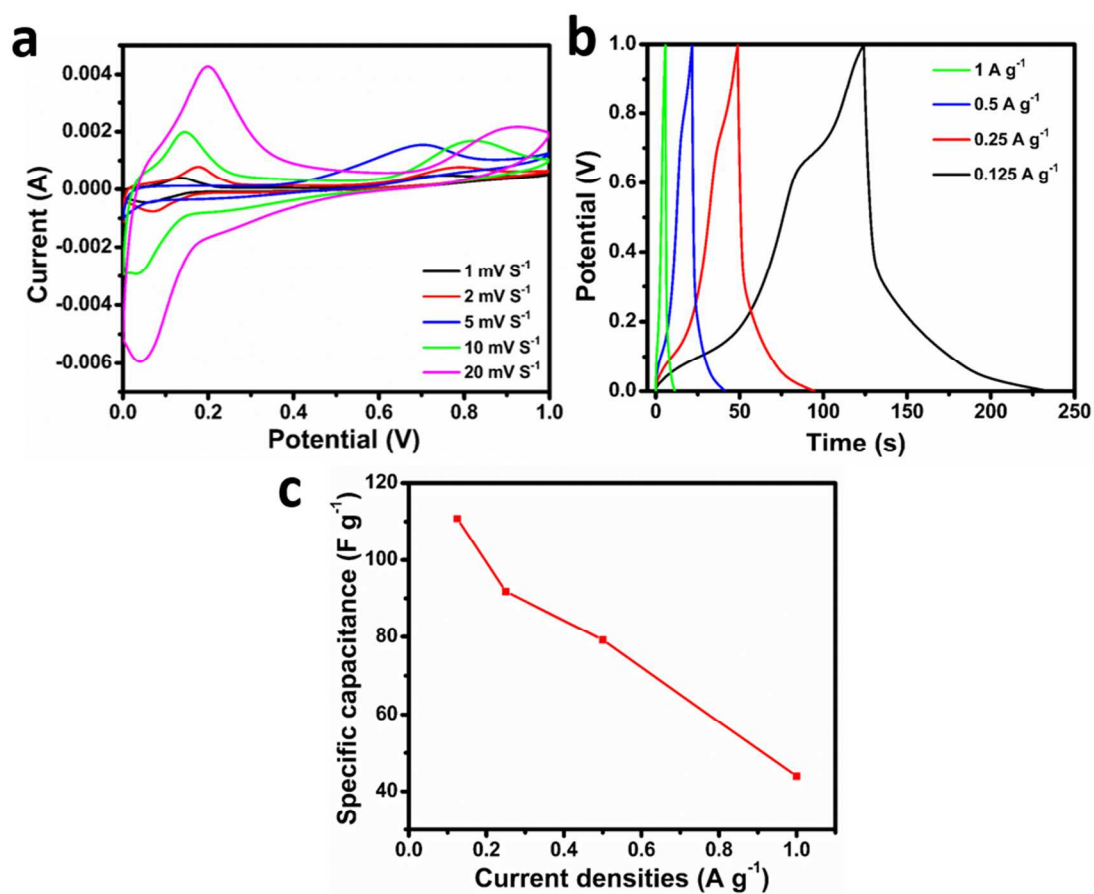

**Figure S12.** CV (a), GCD (b) and specific capacitances calculated from GCD discharge curve (c) of the AYs sample. The electrochemical data are derived from an asymmetrical two-electrode system with 1 M KOH as electrolyte.

**Table S1.** A comparison of supercapacitor performances of NiCo<sub>2</sub>O<sub>4</sub> based electrode materials in previous work

| NiCo <sub>2</sub> O <sub>4</sub><br>Nanostructures                        | Current<br>Collector | Capacitance<br>F g <sup>-1</sup> | Capacitance<br>Retention   | Reference                                                                |
|---------------------------------------------------------------------------|----------------------|----------------------------------|----------------------------|--------------------------------------------------------------------------|
| NiCo <sub>2</sub> O <sub>4</sub> AYs                                      | Ni foam              | 1212                             | 97.9% after<br>5000 cycles | This work                                                                |
| NiCo <sub>2</sub> O <sub>4</sub> micro<br>flowers                         | Ni foam              | 750                              | 102% after<br>3000 cycles  | <i>ACS Appl. Mater.<br/>Interfaces</i> , 2015, <b>7</b> ,<br>17630–17640 |
| NiCo <sub>2</sub> O <sub>4</sub> nanowires                                | Ni foam              | 743                              | 93.8% after<br>3000 cycles | <i>Chem. Commun.</i> ,<br>2012, <b>48</b> , 4465–4467                    |
| NiCo <sub>2</sub> O <sub>4</sub> double-<br>shell hollow spheres          | Ni foam              | 568                              | 85.8% after<br>2000 cycles | <i>NPG Asia Mater.</i> ,<br>2015, <b>7</b> , e165                        |
| NiCo <sub>2</sub> O <sub>4</sub><br>nanorods/nanosheets<br>@carbon fibers | Ni foam              | 1023                             | 91.5% after<br>2000 cycles | <i>Sci. Rep.</i> , 2013, <b>3</b> ,<br>1470                              |
| NiCo <sub>2</sub> O <sub>4</sub> aerogels                                 | graphite             | 1400                             | 91% after<br>2000 cycles   | <i>Adv. Mater.</i> , 2010,<br><b>22</b> , 347–351                        |
| NiCo <sub>2</sub> O <sub>4</sub> nanosheets                               | Ti plates            | 678                              | 100% after<br>2500 cycles  | <i>J. Mater. Chem. A</i> ,<br>2014, <b>2</b> , 4706–4713                 |
| NiCo <sub>2</sub> O <sub>4</sub> hierarchical<br>spheres                  | Ni foam              | 1191                             | 78.3% after<br>1200 cycles | <i>CrystEngComm.</i> ,<br>2014, <b>16</b> , 385–392                      |
| NiCo <sub>2</sub> O <sub>4</sub><br>nanosheets@CNT                        | Ni foam              | 1038                             | 100% after<br>1000 cycles  | <i>J. Mater. Chem. A</i> ,<br>2014, <b>2</b> , 11509–<br>11515           |

**Table S2.** A comparison of OER activity of NiCo<sub>2</sub>O<sub>4</sub> based electrocatalysts in previous work

| NiCo <sub>2</sub> O <sub>4</sub> Catalysts                   | Substrate    | Electrolyte | $\eta$ (mV) at 10 mA cm <sup>-2</sup> | Tafel slope (mV dec <sup>-1</sup> ) | Reference                                               |
|--------------------------------------------------------------|--------------|-------------|---------------------------------------|-------------------------------------|---------------------------------------------------------|
| NiCo <sub>2</sub> O <sub>4</sub> AYs                         | -            | 1M KOH      | 380                                   | 159                                 | This work                                               |
| NiCo <sub>2</sub> O <sub>4</sub> -Graphene                   | -            | 0.1 M KOH   | ~460                                  | 164                                 | <i>J. Mater. Chem. A</i> , 2013, <b>1</b> , 4754–4762   |
| N-doped NiCo <sub>2</sub> O <sub>4</sub> - Graphene          | -            | 0.1 M KOH   | ~450                                  | 156                                 | <i>ACS Nano</i> , 2013, <b>7</b> , 10190-10196          |
| NiCo <sub>2</sub> O <sub>4</sub> nanowire array              | -            | 1M KOH      | ~415                                  | -                                   | <i>J. Mater. Chem. A</i> , 2013, <b>1</b> , 12170–12177 |
| NiCo <sub>2</sub> O <sub>4</sub> core-shell nanowire         | Carbon cloth | 1M NaOH     | 320                                   | 63.1                                | <i>Nano Energy</i> , 2015, <b>11</b> , 333–340          |
| NiCo <sub>2</sub> O <sub>4</sub> – Graphene-MnO <sub>2</sub> | Ni foam      | 0.1 M KOH   | -                                     | 371                                 | <i>Chem. Commun.</i> , 2014, <b>50</b> , 207-209        |
| Urchin-like NiCo <sub>2</sub> O <sub>4</sub>                 | -            | 1 M NaOH    | 419                                   | 51                                  | <i>J. Power Sources</i> , 2014, <b>268</b> , 341-348    |
| Au-NiCo <sub>2</sub> O <sub>4</sub>                          | 3D HPG       | 0.1 M KOH   | ~560                                  | -                                   | <i>Sci. Rep.</i> , 2016, <b>6</b> , 23398               |
| NiCo <sub>2</sub> O <sub>4</sub> nanowire                    | -            | 0.1 M KOH   | 340                                   | 63                                  | <i>Nanoscale</i> , 2016, <b>8</b> , 1390-1400           |
